# Supplementary material for: Porous nanostructures of SnSe: role of ionic liquid, tuning of nanomorphology and mechanistic studies
Source: Royal Society of Chemistry journal article supplement (doi:10.1039/c6ra15745a), 2016-01-01
Supplement: c6ra15745a1.pdf [file c6ra15745a1.pdf]

## Supporting information

### Porous nanostructures of SnSe: Role of ionic liquid, tuning of nanomorphology and mechanistic studies

LaboniDas<sup>a,c</sup>, ApuravGuleria<sup>a</sup>, SumanNeogy<sup>b</sup> and Soumyakanti Adhikari<sup>a\*</sup>

<sup>a</sup>Radiation & Photochemistry Division, <sup>b</sup>Materials Science Division

Bhabha Atomic Research Centre, Mumbai 400085, India

<sup>c</sup>Homi Bhabha National Institute, Training School Complex  
Anushaktinagar, Mumbai 400094, India

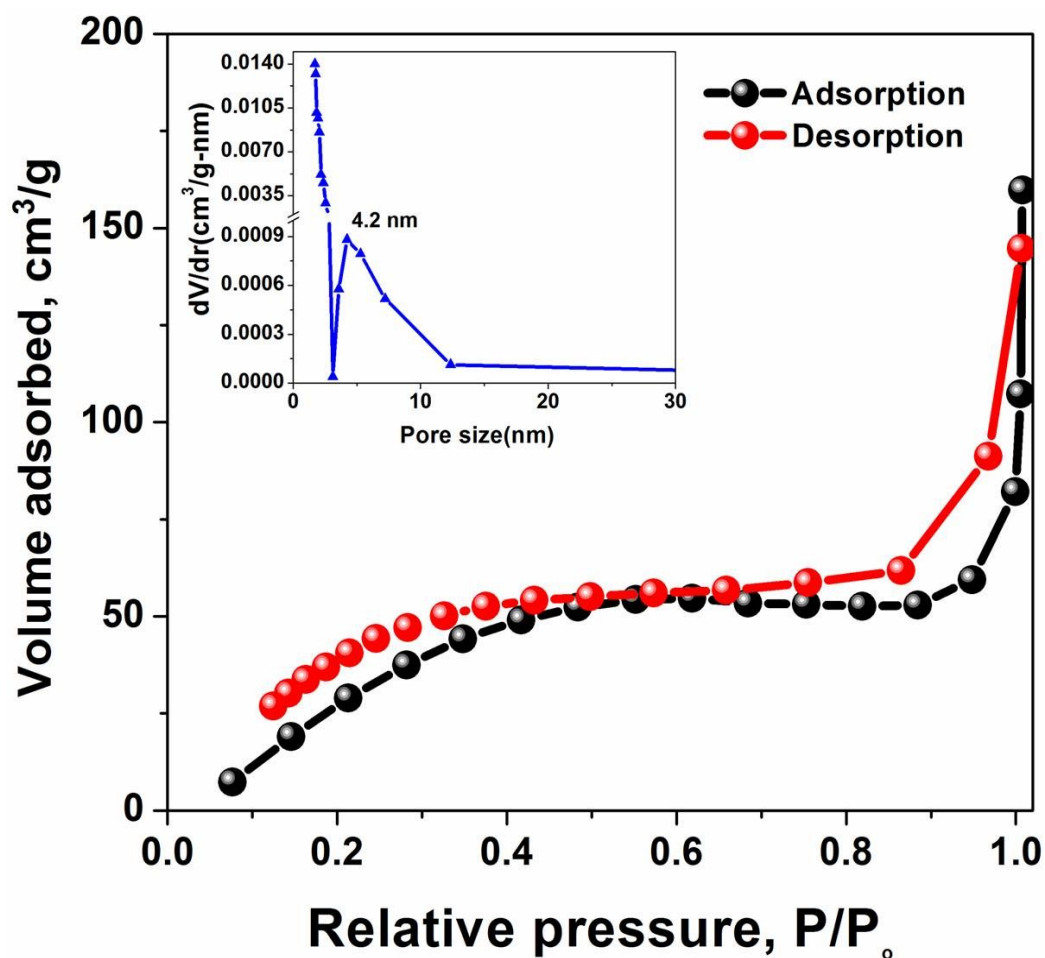

**Fig.S1.** Typical N<sub>2</sub> gas adsorption-desorption isotherm of SnSe nanoparticles synthesized by electron beam irradiation in the host matrix of RTIL. Inset shows the pore size distribution.

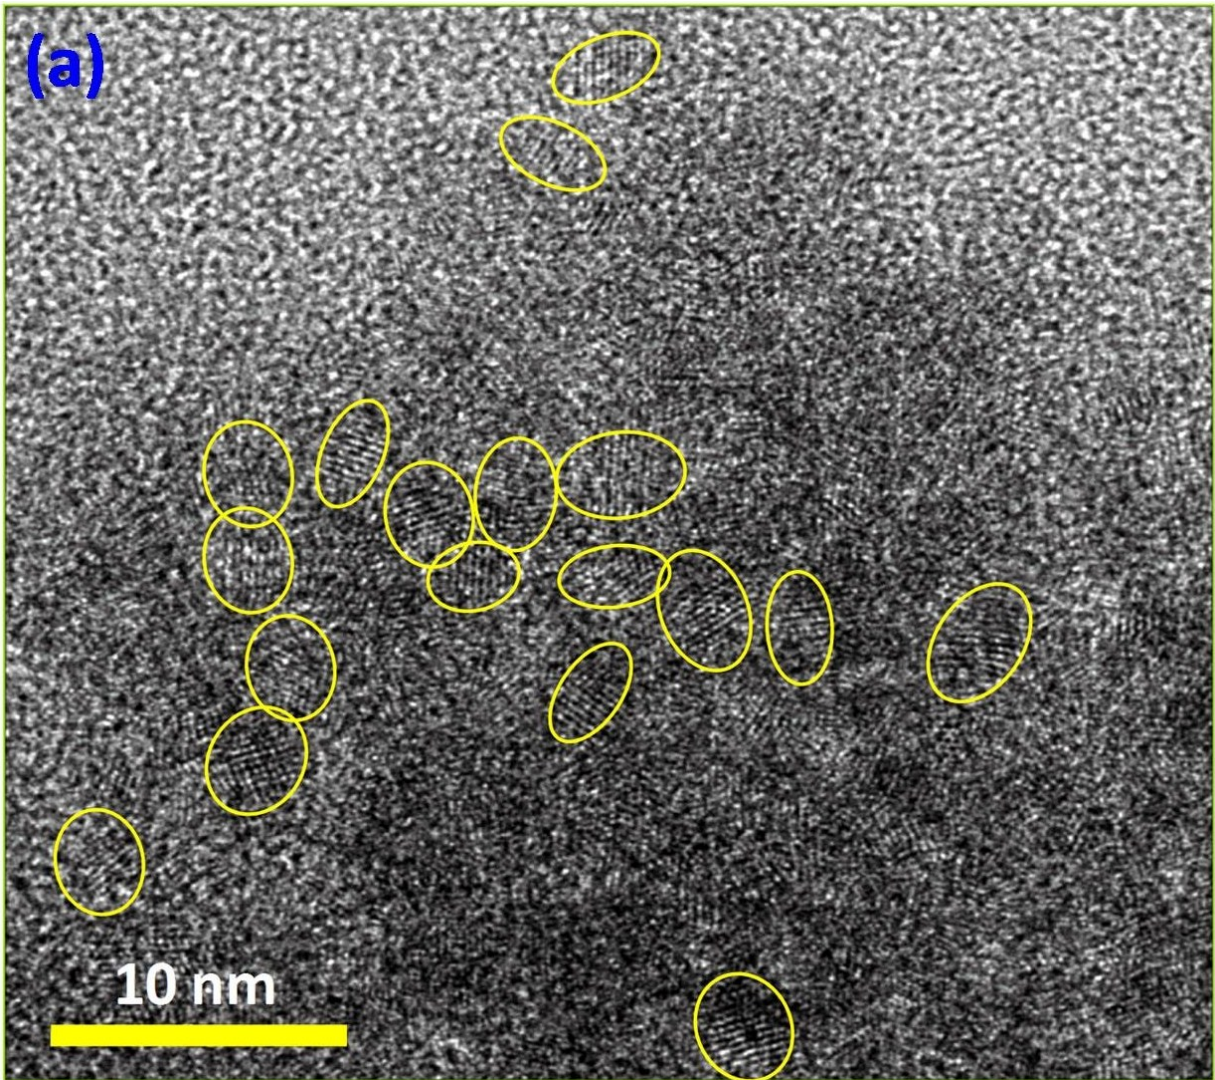

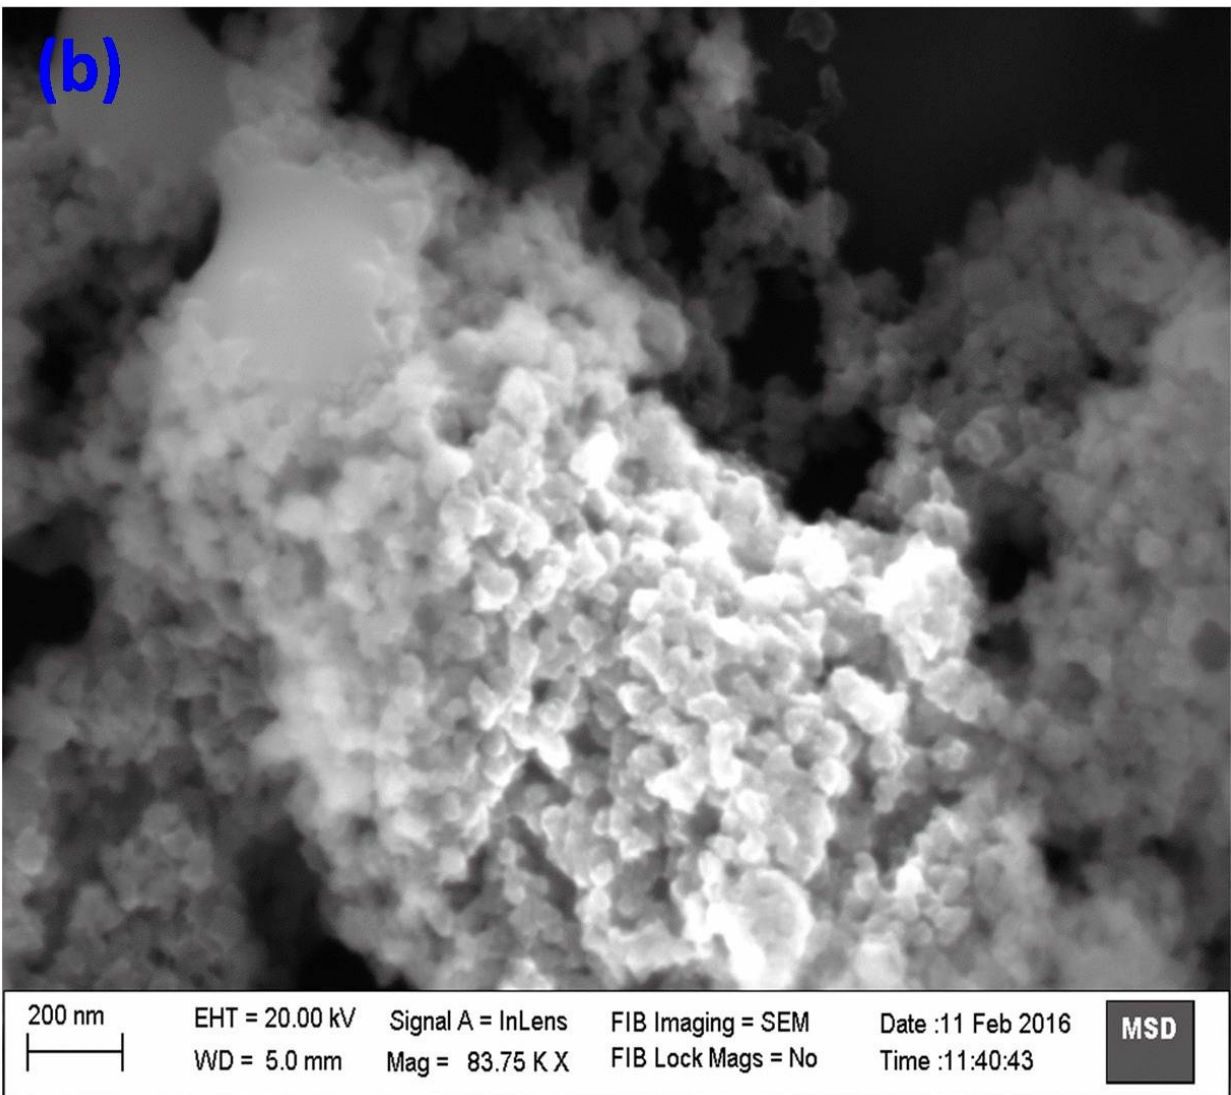

**Fig.S2.** (a) & (b) HRTEM and FESEM image of SnSe nanoparticles synthesized in RTIL via  $\gamma$ -irradiation, respectively.
